# Supplementary material for: Chitosan-Loaded Lagenaria siceraria and Thymus vulgaris Potentiate Antibacterial, Antioxidant, and Immunomodulatory Activities against Extensive Drug-Resistant Pseudomonas aeruginosa and Vancomycin-Resistant Staphylococcus aureus: In Vitro and In Vivo Approaches
Source: MDPI journal article supplement (doi:10.3390/antiox13040428), 2024-03-30
Supplement: s1 [file s1]

**Supplementary Table 1.** Oligonucleotide primers used in the study.

| Target gene    | Primers sequences 5 → 3`                                | Specificity                                  | Annealing temperature (° C) | References |
|----------------|---------------------------------------------------------|----------------------------------------------|-----------------------------|------------|
| <i>oprL</i>    | F: ATGGAATGCTGAAATTCGGC<br>R: CTTCTTCAGCTCGACGCGACG     | <i>P. aeruginosa</i> species-specific primer | 57                          | [18]       |
| <i>nuc</i>     | F: GCGATTGATGGTGATACGGTI<br>R: AGCCAAGCCTTGACGAACTAAAGC | <i>S. aureus</i> species-specific primer     | 55                          | [19]       |
| <i>IL10</i>    | F: GCGGCTGAGGCGCTGTCAT<br>R: CGCCTTGTAGACACCTTGGTCTTGG  | Cytokine gene                                | 60                          | [44]       |
| <i>IFNG</i>    | F: AACGCTACACACTGCATCTTGG<br>R: GACTTCAAAGAGTCTGAGG     | Cytokine gene                                | 55                          | [45]       |
| <i>β-actin</i> | F: TCCTCCTGAGCGCAAGTACTCT<br>R: GCTCAGTAACAGTCCGCCTAGAA | A housekeeping gene                          | 60                          | [43]       |

F, forward; R, reverse; Bp base pair.
